# Supplementary material for: Cognitive-Behavioral Therapy in Dyads (“Shared CBT”): Expanding Options and Improving Access
Source: Atypon-hosted journal article supplement (doi:10.1176/appi.ps.201900507), 2020-05-01
Supplement: appi.ps.201900507.ds001.pdf [file appi.ps.201900507.ds001.pdf]

**On-line Appendix**

| <b>Variable</b>                                                     | <b>n</b> | <b>%</b> |
|---------------------------------------------------------------------|----------|----------|
| Age, mean and SD                                                    | 40.3     | 14.8     |
| Gender                                                              |          |          |
| Male                                                                | 6        | 18.8     |
| Female                                                              | 26       | 81.2     |
| Employment Status                                                   |          |          |
| Employed (full or part-time)                                        | 16       | 50.0     |
| Retired or unemployed by choice                                     | 6        | 18.8     |
| Unemployed for other reasons                                        | 9        | 28.2     |
| Declined to answer                                                  | 1        | 3.1      |
| Any prior psychotherapy <sup>a</sup>                                | 23       | 71.9     |
| Prior CBT                                                           |          |          |
| Individual                                                          | 3        | 9.4      |
| Group                                                               | 3        | 9.4      |
| On antidepressant                                                   | 18       | 56.3     |
| Baseline BDI-II Score, mean and SD                                  | 31.5     | 11.1     |
| Baseline DAS-19 Score, mean and SD                                  | 72.8     | 18.1     |
| Shared CBT sessions attended, mean and SD                           | 10.2     | 2.7      |
| Attended all 12 shared CBT sessions                                 | 15       | 46.9     |
| % of shared CBT sessions with homework partially or fully completed | 85.0     | N/A      |

**Table 1. Baseline characteristics, session attendance and homework completion for shared CBT participants (N=32), presented as number, n, and percent unless otherwise specified**

BDI-II: *Beck Depression Inventory, 2<sup>nd</sup> edition*

DAS-19: *Dysfunctional Attitudes Scale – 19 item*

<sup>a</sup>Includes CBT and other modalities of psychotherapy

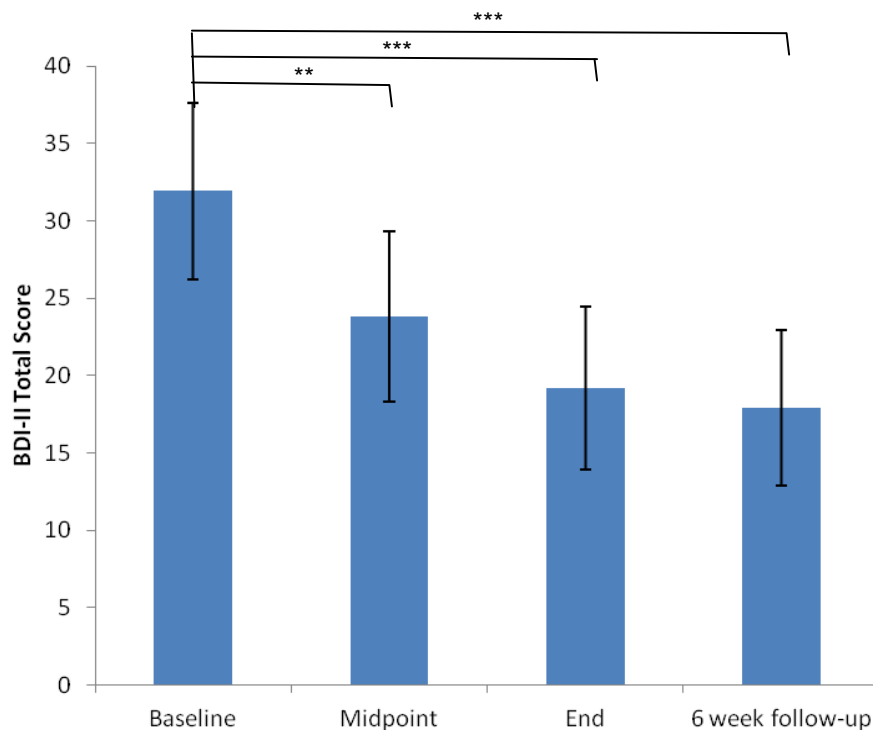

**Figure 1.** BDI-II scores over the course of shared CBT (N=32)

Scores are estimated marginal means from a mixed effects model with time as a repeated measure, adjusted for age and gender.

Error bars are one standard error of the mean.

BDI-II: *Beck Depression Inventory, 2<sup>nd</sup> edition*

\*\* $P < .05$ , \*\*\* $P < .001$

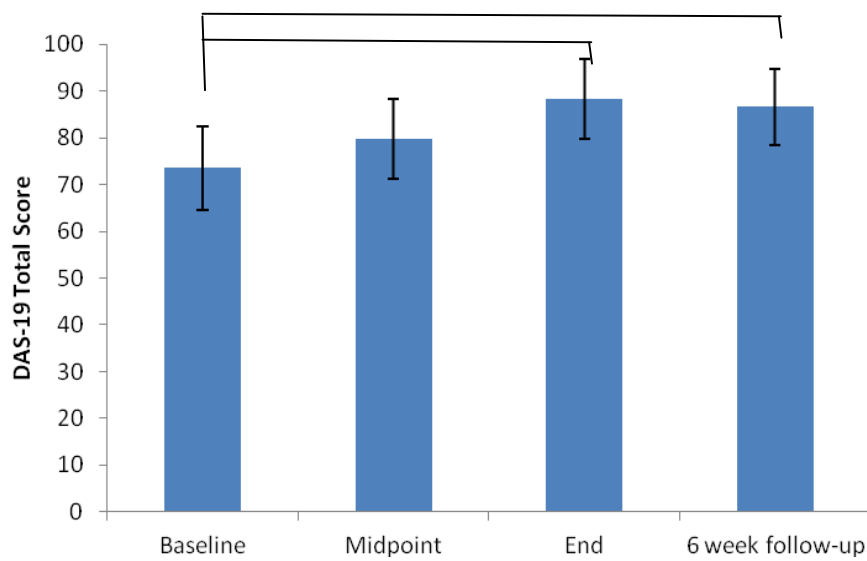

**Figure 2.** DAS-19 scores over the course of shared CBT (N=32)

Scores are estimated marginal means from a mixed effects model with time as a repeated measure, adjusted for age and gender.

Error bars are one standard error of the mean.

DAS-19: *Dysfunctional Attitudes Scale – 19 item*

\*\* $P < .05$ , \*\*\* $P < .001$
